# Supplementary material for: Dynamic interfacial behavior of viscoelastic aqueous hyaluronic acid: effects of molecular weight, concentration and interfacial velocity
Source: Royal Society of Chemistry journal article supplement (doi:10.1039/c3sm52372a), 2014-01-24
Supplement: c3sm52372a.pdf [file c3sm52372a.pdf]

Wetting-dewetting: [http://www.youtube.com/watch?v=i1S1-uN\\_Gmk](http://www.youtube.com/watch?v=i1S1-uN_Gmk)

3D rotational views of Figure 2a, 2b, 2c and 2d, respectively:

<http://www.youtube.com/watch?v=w2UXdlzmaa8>

<http://www.youtube.com/watch?v=yhoVP-mLAIk>

[http://www.youtube.com/watch?v=KviVZ9Myw\\_g](http://www.youtube.com/watch?v=KviVZ9Myw_g)

<http://www.youtube.com/watch?v=JDXaR8-Qvfw>

Rotational views of individual hysteresis landscapes in Figure 3:

<http://www.youtube.com/watch?v=QPLEpDIeftU>

<http://www.youtube.com/watch?v=YN4Aylv9KIs>

<http://www.youtube.com/watch?v=yVku-hIPHY>

<http://www.youtube.com/watch?v=18tagNrJ2dY>

Figure 5a: <http://www.youtube.com/watch?v=Ftrq1UUhkOI>

Figure 5b: <http://www.youtube.com/watch?v=KGtqmE34sas>

Figure 5c: <http://www.youtube.com/watch?v=nTXvtXtSwxx>

Figure 5d: <http://www.youtube.com/watch?v=8M9a4tMcinE>
